# Supplementary material for: Is the peripapillary retinal perfusion related to myopia in healthy eyes? A prospective comparative study
Source: PubMed Central journal article supplement — BMJ Open. 2016 Mar 11;6(3):e010791. doi: 10.1136/bmjopen-2015-010791 (PMC4800142; doi:10.1136/bmjopen-2015-010791), 2016-03-11
Supplement: bmjopen-2015-010791supp_figure.pdf [file bmjopen-2015-010791supp_figure.pdf]

Fig.S1

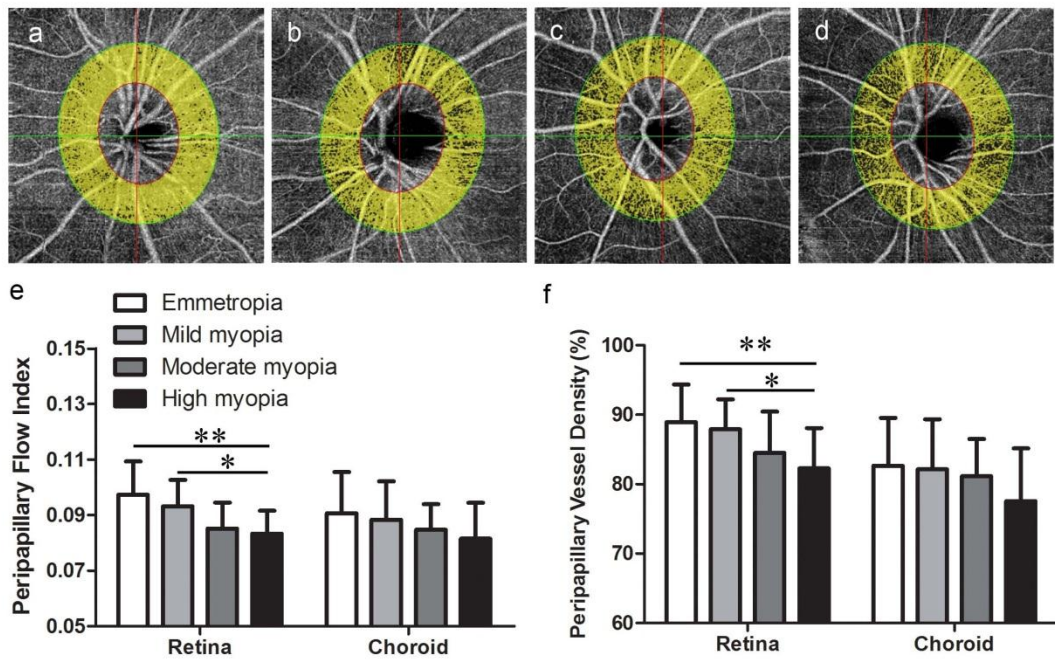

**Fig S1. Peripapillary perfusion was compared among the four groups.**

(a-d) the peripapillary flow index and vessel density were shown in emmetropia (a), mild myopia (b), moderate myopia (c) and high myopia (d). (e) The highly myopic eyes had a lower peripapillary retinal flow index ( $p=0.002$ ) than the emmetropic eyes. (f) The highly myopic eyes had lower retinal vessel density ( $p=0.006$ ) than the emmetropic eyes. \*\*  $p<0.01$ , \*  $p<0.05$
