# Supplementary material for: Is the peripapillary retinal perfusion related to myopia in healthy eyes? A prospective comparative study
Source: PubMed Central journal article supplement — BMJ Open. 2016 Mar 11;6(3):e010791. doi: 10.1136/bmjopen-2015-010791 (PMC4800142; doi:10.1136/bmjopen-2015-010791), 2016-03-11
Supplement: bmjopen-2015-010791supp_tableS1.pdf [file bmjopen-2015-010791supp_tableS1.pdf]

Table S1.Repeatability and Reproducibility of Peripapillary and Parafoveal Perfusion Measurements.

| Variables                      | Intra-visit<br>repeatability |      | Inter-visit<br>repeatability |      |
|--------------------------------|------------------------------|------|------------------------------|------|
|                                | CV (%)                       | ICC  | CV (%)                       | ICC  |
| <b>Peripapillary Perfusion</b> |                              |      |                              |      |
| Retinal flow index             | 2.48                         | 0.96 | 3.47                         | 0.84 |
| Retinal vessel density         | 1.21                         | 0.94 | 1.39                         | 0.85 |
| Choroidal flow index           | 3.37                         | 0.94 | 5.67                         | 0.84 |
| Choroidal vessel density       | 2.44                         | 0.81 | 3.39                         | 0.69 |
| <b>Parafovea Perfusion</b>     |                              |      |                              |      |
| Superficial flow index         | 4.60                         | 0.93 | 7.81                         | 0.79 |
| Superficial vessel density     | 4.55                         | 0.93 | 6.81                         | 0.76 |
| Choroidal flow index           | 2.65                         | 0.98 | 3.75                         | 0.96 |
| Choroidal vessel density       | 1.09                         | 0.99 | 2.33                         | 0.95 |

CV = Coefficient of variation; ICC = Intraclass correlation coefficient
